# Supplementary material for: An aqueous rechargeable lithium battery of high energy density based on coated Li metal and LiCoO2
Source: Royal Society of Chemistry journal article supplement (doi:10.1039/c3cc42676a), 2013-01-01
Supplement: c3cc42676a.pdf [file c3cc42676a.pdf]

# An aqueous rechargeable lithium battery of high energy density based on coated Li metal and LiCoO<sub>2</sub>

Xujiong Wang,<sup>a</sup> Qunting Qu,<sup>a,b</sup> Yuyang Hou,<sup>a</sup> Faxing Wang,<sup>a</sup> and Yuping Wu<sup>\*a†</sup>

Electronic Supplementary Information (ESI)

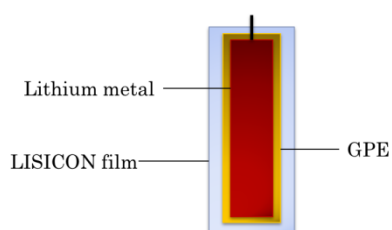

Fig. S1 The schematic structure of the coated Li metal.

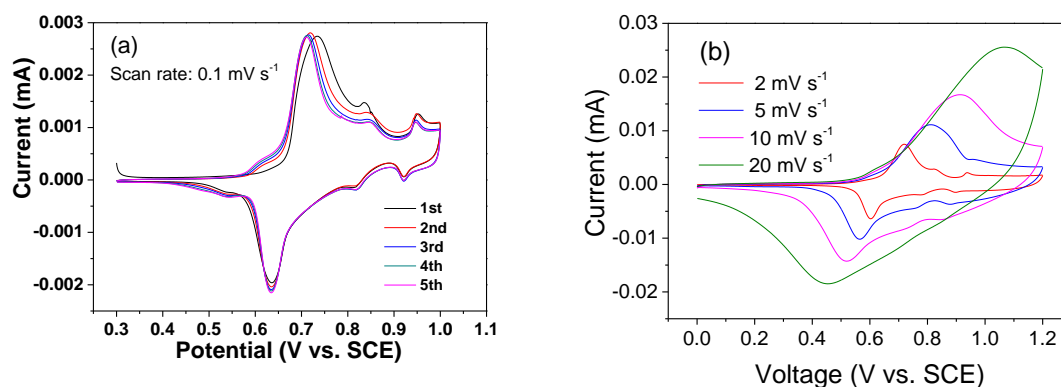

Fig. S2 CV curves of the prepared LiCoO<sub>2</sub> by the sol-gel method in the 0.5 mol l<sup>-1</sup> Li<sub>2</sub>SO<sub>4</sub> solution: (a) at different scans at 0.1 mV s<sup>-1</sup>, and (b) different scan rates.

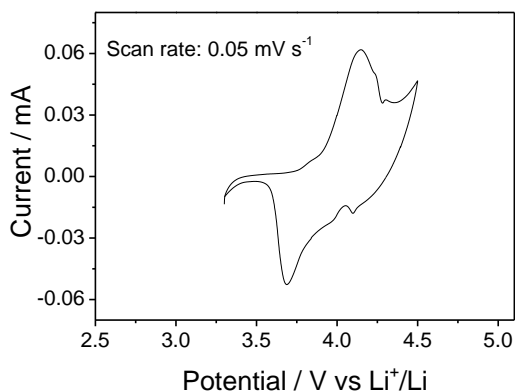

Fig. S3 CV curve of [Li]/0.5 mol l<sup>-1</sup> Li<sub>2</sub>SO<sub>4</sub>/LiCoO<sub>2</sub> ARLB.
